# Supplementary material for: Polyaniline enhances the visible light photocatalytic activities of bismuth oxyhalides
Source: Royal Society of Chemistry journal article supplement (doi:10.1039/d5ra05916j), 2025-01-01
Supplement: d5ra05916j1.pdf [file d5ra05916j1.pdf]

## Polyaniline enhances the visible light photocatalytic activities of bismuth oxyhalides

Rajesh Kumar<sup>a,b</sup>, Swadhin Kumar Jena<sup>a</sup>, Million Mulugeta Habtegbrel<sup>a</sup>, Neha Luhakra<sup>a</sup>, Abhilekha Borah<sup>a</sup>, Aarya Sharma<sup>a</sup> and Prem Felix Siril<sup>a</sup>

<sup>a</sup> School of Chemical Sciences, Indian Institute of Technology Mandi, Mandi, Himachal Pradesh-175005, India

<sup>b</sup> Govt. College Kullu, Himachal Pradesh- 175101, India

\*Corresponding author: [prem@iitmandi.ac.in](mailto:prem@iitmandi.ac.in)

### Table of content:

| Sr No. | Contents                                                                                                                                                                                                                    | Pages |
|--------|-----------------------------------------------------------------------------------------------------------------------------------------------------------------------------------------------------------------------------|-------|
| 1.     | Fig. S1 XRD pattern (a), and FTIR spectra (b), of as synthesized BiOX                                                                                                                                                       | 2     |
| 2.     | Fig. S2 UV-vis absorbance spectra of photocatalytic OII dye degradation under visible light for : (a) PANI, (b) BiOCl, (c) BiOBr, and (d) BiOI photocatalyst                                                                | 3     |
| 3.     | Fig. S3 UV-vis absorbance spectra of photocatalytic OII dye degradation under visible light for : (a) PBCl, (b) PBBr, and (c) PBI composite photocatalyst                                                                   | 4     |
| 4.     | Fig. S4 (a) Time-resolved UV-visible absorbance spectra of NBT during visible light irradiation in presence of PBI composite and (b) the respective kinetic curve.                                                          | 5     |
| 5.     | Fig. S5 Effect of varying pH (acidic, 0.1 M HCl neutral and basic, 0.1 M NaOH) on the photocatalytic performance of PBI on <b>(a)</b> degradation of OII dye, and <b>(b)</b> photocatalytic reduction of Cr(VI) to Cr(III). | 6     |
| 6.     | Fig. S6 FESEM images of (a) BiOI and (b) PANI                                                                                                                                                                               | 6     |
| 7.     | Fig. S7 XPS survey spectrum of PANI and as synthesized nanocomposites                                                                                                                                                       | 7     |
| 8.     | Fig. S8 Tauc plot showing band gap energy of (a) BiOCl and (b) PANI BiOBr                                                                                                                                                   | 7     |
| 9.     | Table: S1 Comparison of the photocatalytic activity of the PANI-BiOI with some other hybrid composites for the degradation of various pollutants under visible light                                                        | 8     |

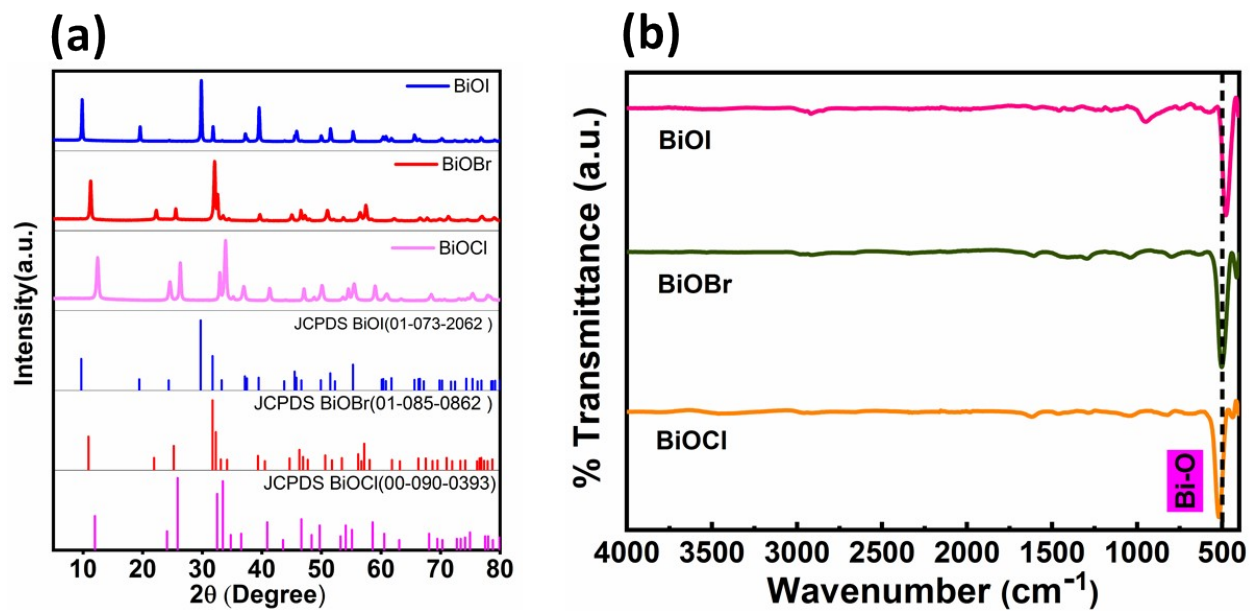

**Fig. S1** (a) XRD pattern and (b) FTIR spectra of as synthesized BiOX.

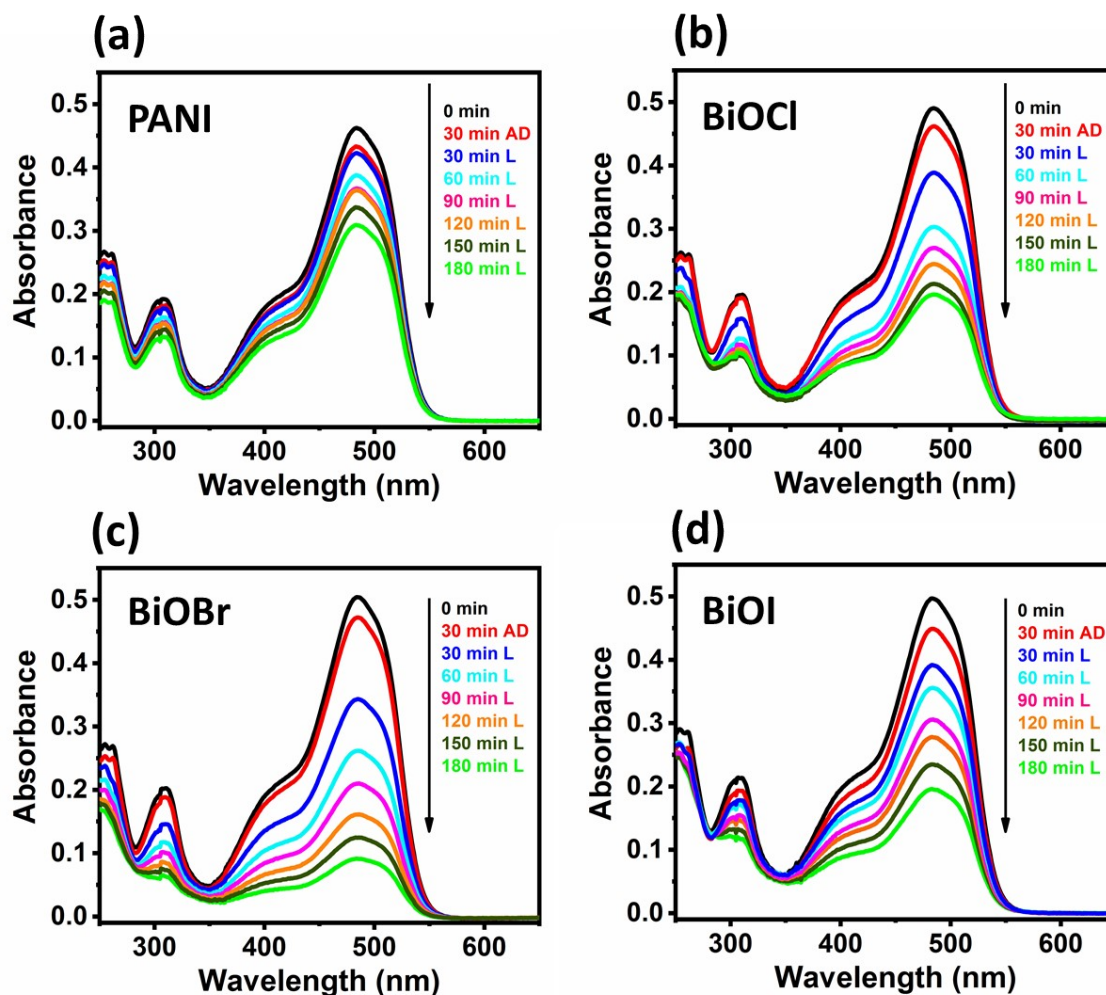

**Fig. S2** UV-vis absorbance spectra of photocatalytic OII dye degradation under visible light for : (a) PANI, (b) BiOCl, (c) BiOBr, and (d) BiOI photocatalyst.

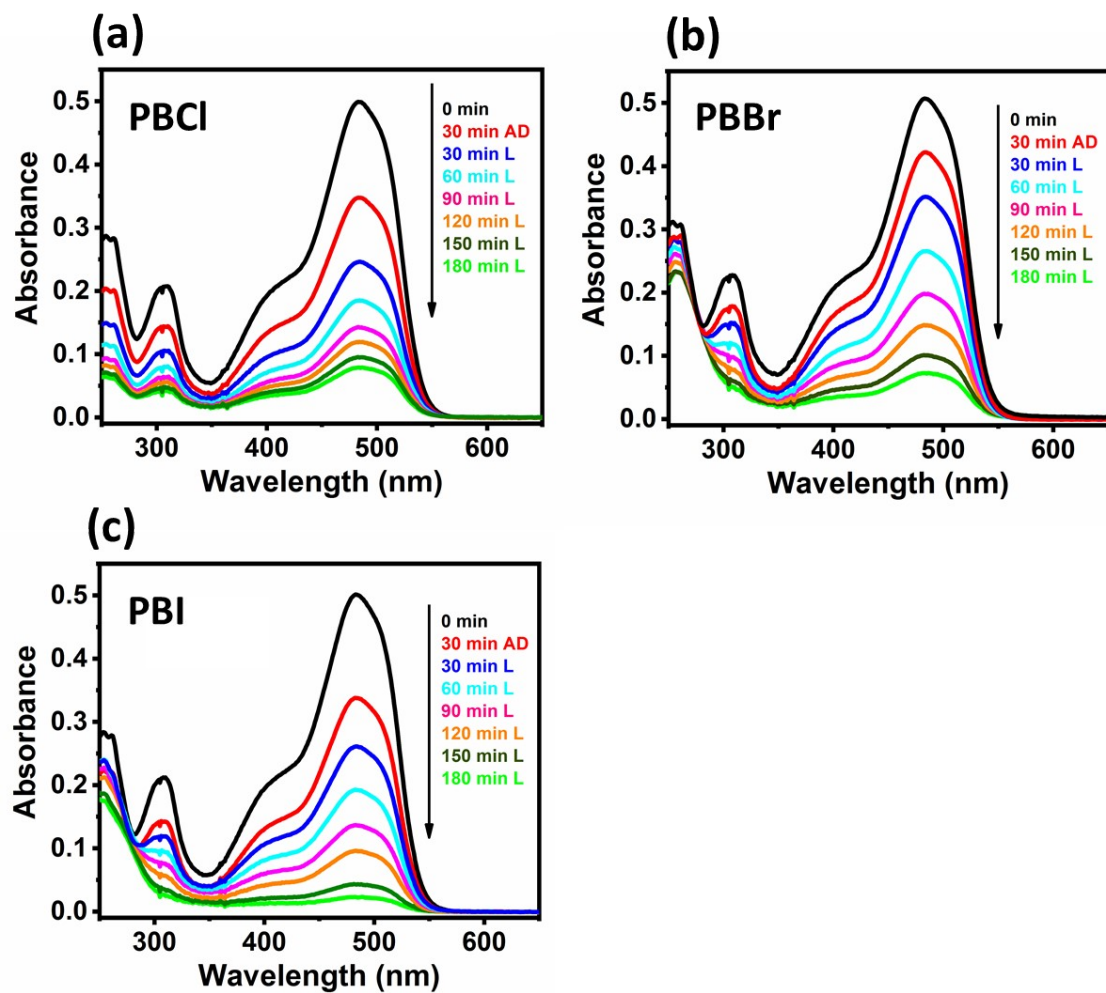

**Fig. S3** UV-vis absorbance spectra of photocatalytic OII dye degradation under visible light for : (a) PBCl, (b) PBBr, and (c) PBI composite photocatalyst.

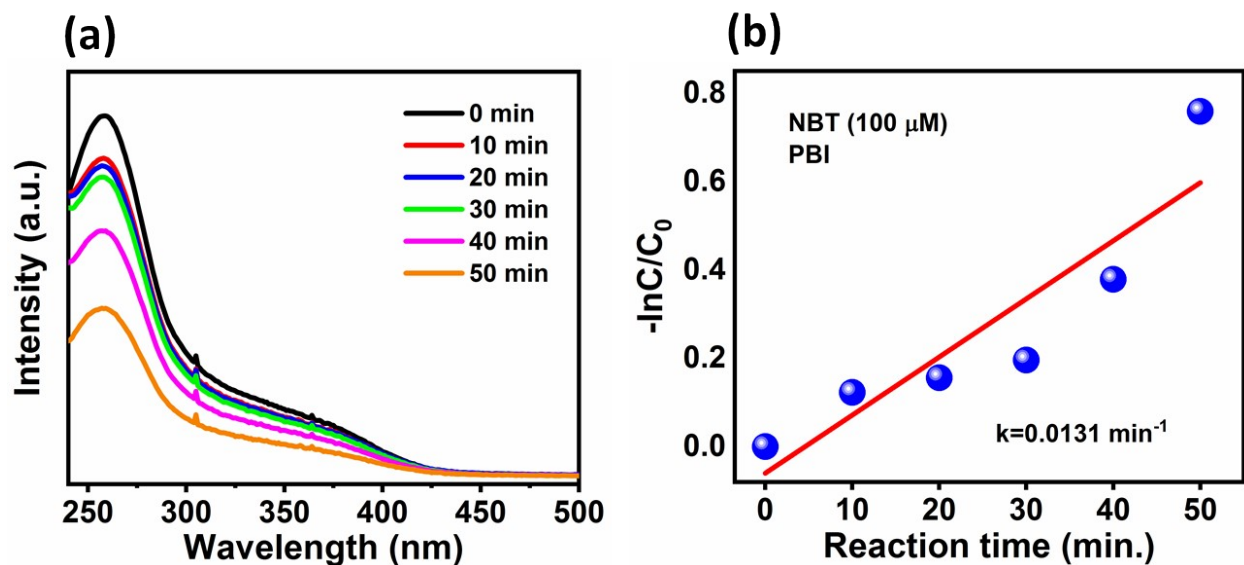

**Fig. S4** (a) Time-resolved UV-visible absorbance spectra of NBT during visible light irradiation in presence of PBI composite and (b) the respective kinetic curve.

**Concentration of  $\bullet\text{O}_2^-$  radicals was calculated using the formula:**

$$\text{Concentration of } \bullet\text{O}_2^- \text{ radical} = k_{\text{NBT}} \times t \times C_{\text{initial}} \times 4$$

$$k_{\text{NBT}} = 0.0131 \text{ min}^{-1} \text{ (loss kinetic constant of NBT)}$$

$$t = 50 \text{ min (the light exposure time)}$$

$$C_{\text{initial}} = 100 \text{ } \mu\text{M (NBT initial concentration)}$$

4 is the constant coefficient between the reaction of NBT and  $\bullet\text{O}_2^-$

$$\text{Concentration of } \bullet\text{O}_2^- \text{ radical} = 2.62 \times 10^{-5} \text{ M}$$

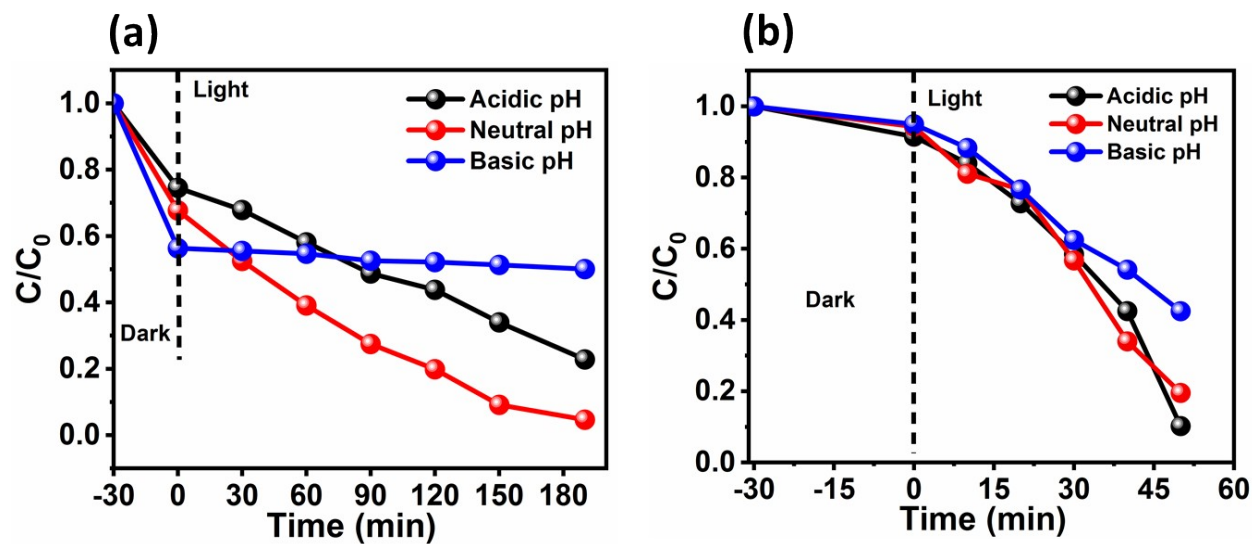

**Fig. S5** Effect of varying pH (acidic, 0.1 M HCl neutral and basic, 0.1 M NaOH) on the photocatalytic performance of PBI on (a) degradation of OII dye, and (b) photocatalytic reduction of Cr(VI) to Cr(III).

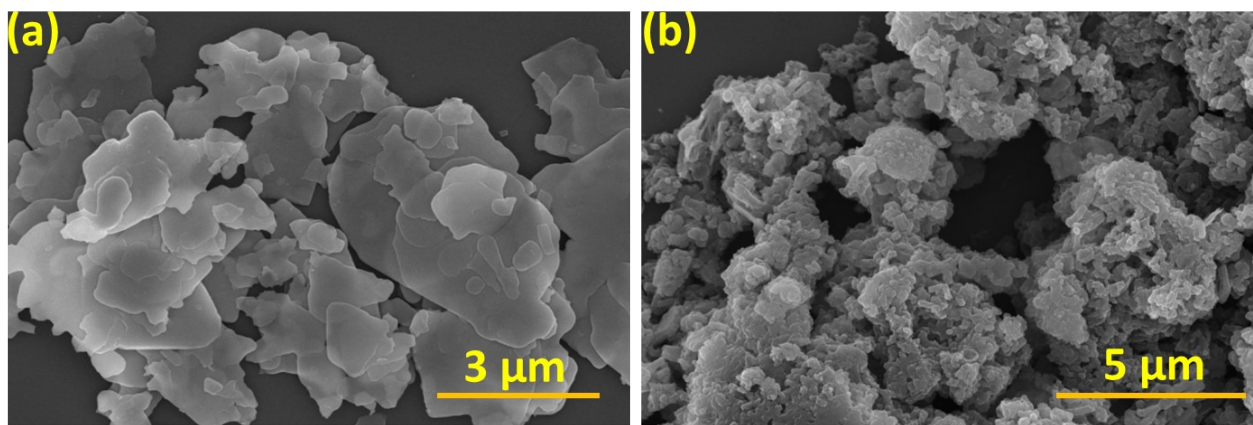

**Fig. S6** FESEM images of (a) BiOI and (b) PANI



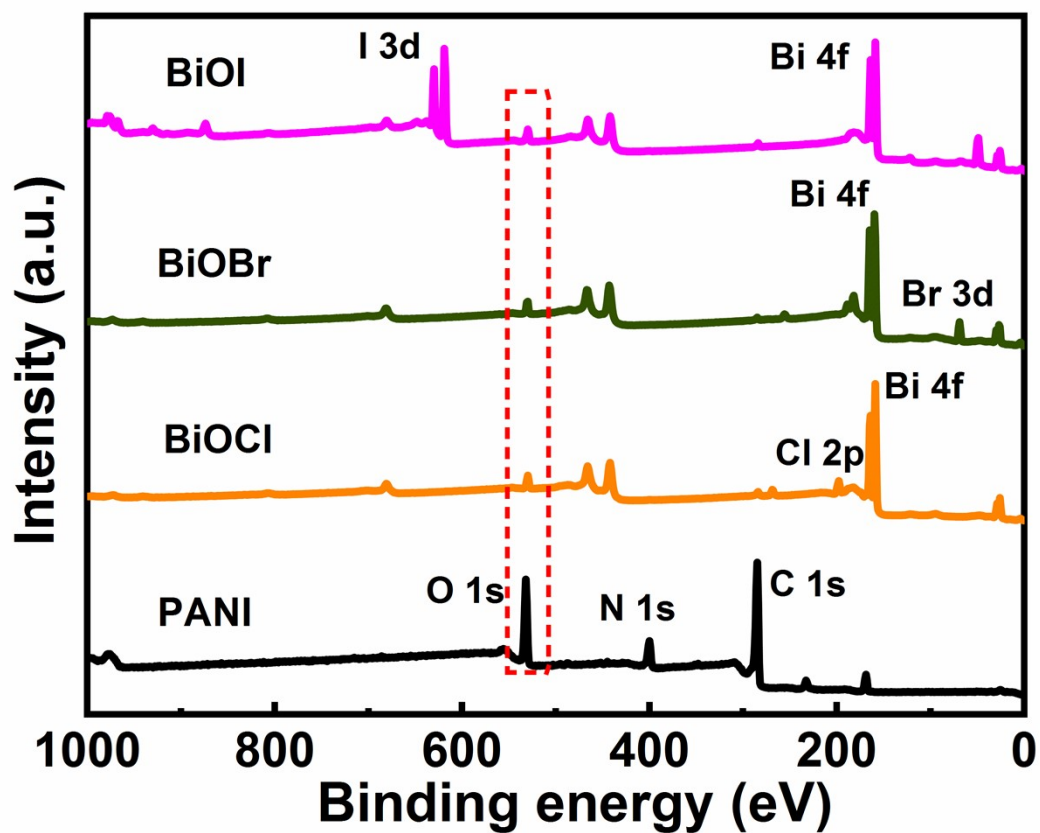

Fig. S7 XPS survey spectrum of PANI and as synthesized nanocomposites

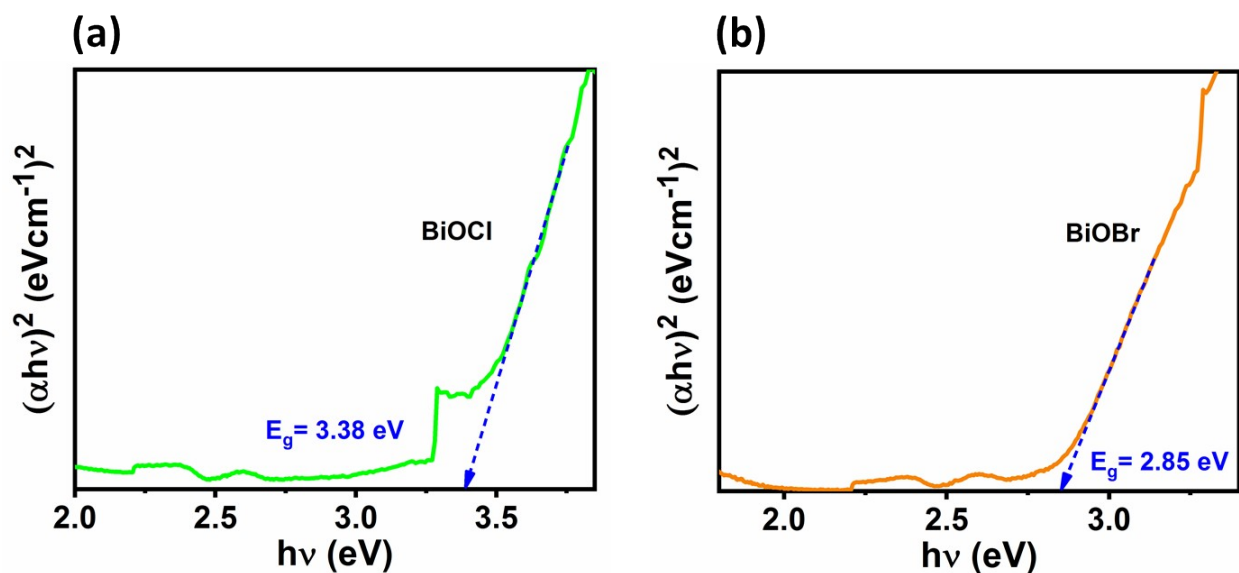

Fig. S8 Tauc plot showing band gap energy of (a) BiOCl and (b) PANI BiOBr.

**Table: S1** Comparison of the photocatalytic activity of the PANI-BiOI with some other hybrid composites for the degradation of various pollutants under visible light.

| Photocatalyst                               | Pollutant, Conc. (ppm) | Catalyst amount (mg/mL) | Light source                  | Removal (%)    | Time (min)    | Ref.                |
|---------------------------------------------|------------------------|-------------------------|-------------------------------|----------------|---------------|---------------------|
| ZnO/BiOI                                    | MO, 10                 | 1                       | Halogen tungsten lamp (500 W) | 78             | 240           | <sup>1</sup>        |
| BiOI/Bi <sub>2</sub> MoO <sub>6</sub>       | RhB, 7                 | 1                       | Xe lamp (300 W)               | 95             | 90            | <sup>2</sup>        |
| 2D/3D g-C <sub>3</sub> N <sub>4</sub> /BiOI | AR, 10                 | 0.1                     | Mercury lamp (250 W)          | 74.64          | 150           | <sup>3</sup>        |
| Ppy-BiOI                                    | RhB, 4                 | 1                       | Xe lamp                       | 83             | 300           | <sup>4</sup>        |
|                                             | BPA, 30                | 1                       |                               | 50             | 300           |                     |
|                                             | 2,4-DCP, 30            | 1                       |                               | 29             | 300           |                     |
|                                             | TC, 30                 | 1                       |                               | 61             | 300           |                     |
| AgI/BiOI                                    | MO, 20                 | 1                       | Xe lamp (300 W)               | 90.2           | 180           | <sup>5</sup>        |
|                                             | Phenol, 20             | 1                       |                               | 41.6           | 180           |                     |
| BiOI/BiVO <sub>4</sub>                      | RhB, 5                 | 0.6                     | Xe lamp (300 W)               | 97             | 75            | <sup>6</sup>        |
| NiS/BiOI                                    | RhB, 20                | 0.3                     | Xe lamp (300 W)               | 99.8           | 200           | <sup>7</sup>        |
|                                             | TC, 50                 | 0.3                     |                               | 96.3           | 140           |                     |
|                                             | Cr(VI), 50             | 0.27                    |                               | 92.8           | 180           |                     |
| Fe-nPPy/BiOI                                | CV, 10                 | 0.5                     | White LED (192 W)             | 84             | 120           | <sup>8</sup>        |
|                                             | TC, 20                 | 1                       |                               | 74             | 120           |                     |
| <b>PANI/BiOI</b>                            | <b>Oil, 20 Cr(VI)</b>  | <b>0.5 0.5</b>          | <b>White LED (160 W)</b>      | <b>95.3 90</b> | <b>180 50</b> | <b>Current work</b> |

## References:

- 1 J. Jiang, X. Zhang, P. Sun and L. Zhang, 2011, 20555–20564.
- 2 Y. Wang, M. Wang, J. Liu, L. Wang, H. Pang, Y. Su, J. Pan, Z. Z. Xue and Y. Peng, *Inorg. Chem.*, 2023, **62**, 9158–9167.
- 3 J. Li, L. Guan, L. Jiang, M. Xu, J. Li, J. Zuo, C. Tan and Z. Xia, *ACS Omega*, 2024, **9**, 361–370.
- 4 J. Xu, Y. Hu, C. Zeng, Y. Zhang and H. Huang, *J. Colloid Interface Sci.*, 2017, **505**, 719–727.
- 5 H. Cheng, B. Huang, Y. Dai, X. Qin and X. Zhang, *Langmuir*, 2010, **26**, 6618–6624.
- 6 S. Ni, T. Zhou, H. Zhang, Y. Cao and P. Yang, *ACS Appl. Nano Mater.*, 2018, **1**, 5128–5141.



- 7 C. T. Haile, N. Ahmad, C. W. Chiu and C. F. Jeffrey Kuo, *Chemosphere*, 2023, **323**, 138108.
- 8 R. Kumar, R. Gogoi, K. Sharma, A. Singh and P. F. Siril, *Environ. Sci. Adv.*, 2023, **3**, 85–96.
